# Supplementary material for: Systematic Review of Heel Puncture-Related Osteomyelitis of the Calcaneus in Newborn Infants
Source: Springer Nature journal article supplement (doi:10.1007/s40121-024-00957-8), 2024-04-08
Supplement: MOESM1 [file 26955800]

## **Systematic Review of Heel Puncture-Related Osteomyelitis of the Calcaneus in Newborn Infants**

Vidmi Taolam Martin<sup>1,2\*</sup>, MD, PhD, Ismail Ahmed Dhagey.<sup>1</sup>, BSc, Hangtian Wu<sup>1,2</sup>, MD, PhD, Shaoyong Xu<sup>1,2</sup>, MD, PhD, Bin Yu<sup>1,2\*</sup>, MD, PhD.

1. Division of Orthopaedic Surgery, Department of Orthopaedics, Nanfang Hospital, Southern Medical University, Guangzhou 510515, China.
2. Guangdong Provincial Key Laboratory of Bone and Cartilage Regenerative Medicine, Nanfang Hospital, Southern Medical University, Guangzhou 510515, China.

\*Corresponding Authors at: Division of Orthopaedic Surgery, Department of Orthopaedics, Nanfang Hospital, Southern Medical University, Guangzhou 510515, China. Guangdong Provincial Key Laboratory of Bone and Cartilage Regenerative Medicine, Nanfang Hospital, Southern Medical University, Guangzhou 510515, China.

*E-mail addresses:* yubinol@163.com (B. Yu), martin.smu@foxmail.com (VT. Martin).

**Table S1.** The National Institutes of Health (NIH) quality assessment tool for case reports/case reports

| Author                       | Country | 1** | 2   | 3              | 4              | 5   | 6**            | 7**          | 8              | 9   | AHRQ standards |
|------------------------------|---------|-----|-----|----------------|----------------|-----|----------------|--------------|----------------|-----|----------------|
| Lilien <sup>4</sup> , 1976   | USA     | Yes | Yes | Not Applicable | Not Applicable | Yes | Not Applicable | Yes          | Not Applicable | Yes | Fair           |
| Canale <sup>5</sup> , 1981   | USA     | Yes | Yes | Not Applicable | Not Applicable | Yes | Not Applicable | Yes          | Not Applicable | Yes | Fair           |
| Goldberg <sup>6</sup> , 1981 | Israel  | Yes | Yes | Not Applicable | Not Applicable | Yes | Not Applicable | Yes          | Not Applicable | Yes | Fair           |
| Borris <sup>7</sup> , 1986   | Denmark | Yes | Yes | Not Applicable | Not Applicable | Yes | Not Applicable | Yes          | Not Applicable | Yes | Fair           |
| Gjurić <sup>8</sup> , 1992   | Croatia | Yes | Yes | Not Applicable | Not Applicable | Yes | Not Applicable | Yes          | Not Applicable | Yes | Fair           |
| Abril <sup>9</sup> , 1999    | Spain   | Yes | Yes | Not Applicable | Not Applicable | Yes | Not Applicable | Yes          | Not Applicable | Yes | Fair           |
| Yüksel <sup>10</sup> , 2007  | Turkey  | Yes | Yes | Not Applicable | Not Applicable | Yes | Not Applicable | Yes          | Not Applicable | Yes | Fair           |
| Tural <sup>11</sup> , 2016   | Turkey  | Yes | Yes | Not Applicable | Not Applicable | Yes | Not Applicable | Not Reported | Not Applicable | Yes | Poor           |

Abbreviation: AHRQ, Agency for Healthcare Research and Quality; USA, The United States of America.

Major Components : 1. Was the study question or objective clearly stated? 2. Was the study population clearly and fully described, including a case definition? 3. Were the cases consecutive? 4. Were the subjects comparable? 5. Was the intervention clearly described? 6. Were the outcome measures clearly defined, valid, reliable, and implemented consistently across all study participants? 7. Was the length of follow-up adequate? 8. Were the statistical methods well-described? 9. Were the results well-described?

\*\*Agency for Healthcare Research and Quality (AHRQ) standards.
